# Supplementary material
Source: ML conference proceedings conference paper supplement (https://proceedings.neurips.cc/paper_files/paper/2017/hash/f45a1078feb35de77d26b3f7a52ef502-Abstract.html)
Supplement: Supplementary file [file f45a1078feb35de77d26b3f7a52ef502-Supplemental.zip]

## A Data flow of Wassterwein learning for point process

Figure 4 illustrates the data flow for WGANTPP.

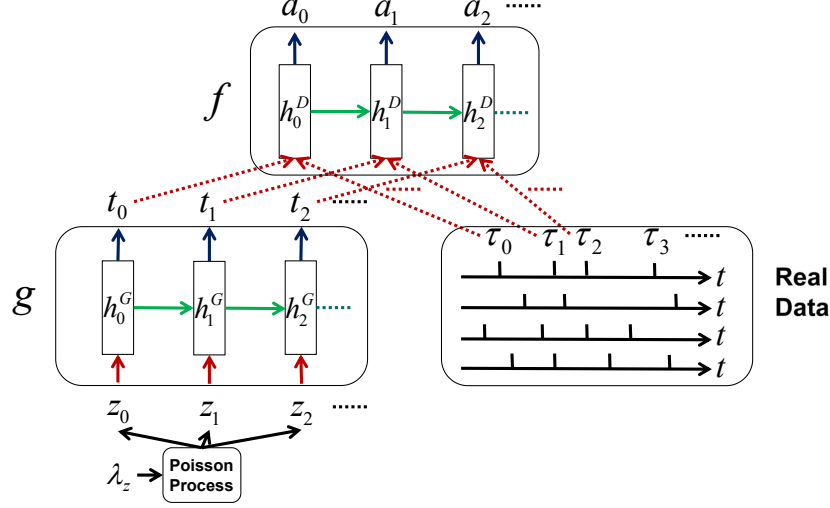

Figure 4: The input and output sequences are  $\zeta = \{z_1, \dots, z_n\}$  and  $\rho = \{t_1, \dots, t_n\}$  for generator  $g_\theta(\zeta) = \rho$ , where  $\zeta \sim \text{Poisson}(\lambda_z)$  process and  $\lambda_z$  is a prior parameter estimated from real data. Discriminator computes the Wassterwein distance between the two distributions of sequences  $\rho = \{t_1, t_2, \dots\}$  and  $\xi = \{\tau_1, \tau_2, \dots\}$

## B Proof that $\|\cdot\|_\star$ is a norm

It is obvious that  $\|\cdot\|_\star$  is nonnegative and symmetric. If  $\|\xi - \rho\|_\star = 0$ , then  $m = n$  and there is a assignment  $\sigma$  such that  $x_i = y_{\sigma(i)}$  for all  $i = 1, \dots, n$ .

Now we prove that  $\|\cdot\|_\star$  has triangle inequality. WLOG, assume that  $\xi = \{x_1, \dots, x_n\}$ ,  $\rho = \{y_1, \dots, y_k\}$  and  $\zeta = \{z_1, \dots, z_m\}$  where  $n \leq k \leq m$ . Define the permutation  $\hat{\sigma}$  on  $\{1, \dots, k\}$  by

$$\hat{\sigma} := \arg \min_{\sigma} \sum_{i=1}^n \|x_i - y_{\sigma(i)}\| + \sum_{i=n+1}^k \|s - y_{\sigma(i)}\| \quad (11)$$

Then we know that

$$\|\xi - \rho\|_\star = \sum_{i=1}^n \|x_i - y_{\hat{\sigma}(i)}\| + \sum_{i=n+1}^k \|s - y_{\hat{\sigma}(i)}\| \quad (12)$$

Therefore, we have that

$$\begin{aligned}
\|\xi - \zeta\|_* &= \min_{\sigma} \sum_{i=1}^n \|x_i - z_{\sigma(i)}\| + \sum_{i=n+1}^m \|s - z_{\sigma(i)}\| \\
&\leq \min_{\sigma} \sum_{i=1}^n (\|x_i - y_{\hat{\sigma}(i)}\| + \|y_{\hat{\sigma}(i)} - z_{\sigma(i)}\|) + \sum_{i=n+1}^k (\|s - y_{\hat{\sigma}(i)}\| + \|y_{\hat{\sigma}(i)} - z_{\sigma(i)}\|) \\
&\quad + \sum_{i=k+1}^m \|s - z_{\sigma(i)}\| \\
&= \|\xi - \rho\|_* + \min_{\sigma} \sum_{i=1}^k \|y_{\hat{\sigma}(i)} - z_{\sigma(i)}\| + \sum_{i=k+1}^m \|s - z_{\sigma(i)}\| \\
&= \|\xi - \rho\|_* + \min_{\sigma} \sum_{i=1}^k \|y_i - z_{\sigma(\hat{\sigma}^{-1}(i))}\| + \sum_{i=k+1}^m \|s - z_{\sigma(i)}\| \\
&= \|\xi - \rho\|_* + \|\rho - \zeta\|_*
\end{aligned} \tag{13}$$

where the last equality is due to the fact that the minimization is taken over all permutations  $\sigma$  of  $\{1, \dots, m\}$ , and  $\hat{\sigma}$  is a fixed permutation of  $\{1, \dots, k\}$  where  $k \leq m$ . This completes the proof.

## C Proposed $\|\cdot\|_*$ Distance on the Real Line

In this section, we prove that finding the distance between sequences  $\xi$  and  $\rho$ ,

$$\|\xi - \rho\|_* = \min_{\sigma} \sum_{i=1}^n \|x_i - y_{\sigma(i)}\|_o + \sum_{i=n+1}^m \|s - y_{\sigma(i)}\|, \tag{14}$$

in the case of temporal point process in  $[0, T)$ , i.e.,  $\xi = \{t_1 < t_2 < \dots < t_n\}$  and  $\rho = \{\tau_1 < \tau_2 < \dots < \tau_m\}$ , reduces to

$$\|\xi - \rho\|_* = \sum_{i=1}^n |t_i - \tau_i| + \sum_{i=n+1}^m (T - y_i), \tag{15}$$

Here, without loss of generality  $n \leq m$  is assumed. The choice of  $s = T$  is basically padding the shorter sequences with  $T$ . Given, the sequences have the same length now, we claim that the identity permutation i.e.,  $\sigma(i) = i$  is the minimizer in (14). We proceed by a proof by contradiction. Assume that the minimizer is NOT the identity permutation. Then, find the first  $i$  such that  $\sigma(i) \neq i$ . Then,  $\sigma(i) = j$  where  $j > i$ . Therefore, there should be a  $k > i$  such that  $\sigma(k) = i$ . Then, if you change the permutation according to  $\sigma(i) = i$  and  $\sigma(k) = j$  the cost will change by

$$\Delta = \underbrace{(|t_i - \tau_j| + |t_k - \tau_i|)}_{\text{for the old permutation}} - \underbrace{(|t_i - \tau_i| + |t_k - \tau_j|)}_{\text{for the new permutation}} \tag{16}$$

Given  $i < j$  and  $i < k$ , it is easy to see that  $\Delta > 0$ . This means that we've found a better permutation which contradicts our assumption. Therefore, the optimal permutation will match the event points in an increasing order one by one.

## D Equivalence of the $\|\cdot\|_*$ Distance and Difference in Count Measures

The count measure of a temporal point process is a special case of the one defined for point processes in general space in Section 2.1. For a Borel subset  $B \subset S = [0, T)$  we have  $N(B) = \int_{t \in B} \xi(t) dt$ . With a little abuse of notation we write  $N(t) := N([0, t)) = \int_0^t \xi(t) dt$ . Figure 1 is a good guidance through this paragraph. Starting from time 0 the first gap in count measure starts from  $\min(t_1, \tau_1)$  and ends in  $\max(t_1, \tau_1)$ . Therefore, there is difference equal to  $s_1 = \max(t_1, \tau_1) - \min(t_1, \tau_1) = |t_1 - \tau_1|$  in the count measure. Similarly, the second block of difference has volume of  $s_2 = |t_2 - \tau_2|$ , and so on. Finally, for  $m > n$  the  $(n+i)$ -th block make a difference of  $s_{n+i} = T - \tau_{n+i}$ . Therefore, the area ( $L_1$  distance) between the two sequences is a equal to  $S = \sum_{i=1}^m s_i$ . On the other hand by looking (15) we observe that  $\|\xi - \rho\|_* = \sum_{i=1}^m s_i$ . Therefore, by choice of  $s = T$  as an anchor point, the distance we have is exactly the area between the two count measures.
